# Supplementary material
Source: publisher figshare collection journal article supplement (https://karger.figshare.com/ndownloader/files/30832219)
Supplement: Supplementary file 1 [file 30832219]

Supplementary Table 3 Summary of post-operative complications (prospectives studies).

|  | **CLAVIEN DINDO I** | | | | **CLAVIEN DINDO II** | | **CLAVIEN DINDO III** | | | |  |
| --- | --- | --- | --- | --- | --- | --- | --- | --- | --- | --- | --- |
| **Author** | **Dysuria, n (%)** | **Stress incontinence, n (%)** | **Transient urinary incontinence, n (%)** | **Permanent urinary incontinence, n (%)** | **Renal Insufficiency, n (%)** | **Urge incontinence, n (%)** | **Reoperation for persistent prostatic tissue in bladder, n (%)** | **Hydronefrosis, n (%)** | **urethral stricture, n (%)** | **bladder neck contracture (III)** | **N. of Procedures** |
| Tan56 | Nd | Nd | 6 (19.4) | 1 (3.2) | Nd | Nd | 0 | Nd | 1 (3.2) | Nd | 31 |
| Kuntz55 | Nd | Nd | 5 (1.4) | Nd | Nd | Nd | Nd | Nd | Nd | Nd | 346 |
| Montorsi53 | 33 (63.5) | 1 (1.9) | 25 (48.1) | Nd | Nd | Nd | Nd | Nd | 1 (1.9) | Nd | 52 |
| Gupta50 | 5 (10) | Nd | 1 (2) | Nd | Nd | Nd | Nd | Nd | 1 (2) | Nd | 50 |
| Wilson48 | Nd | Nd | 7 (22.6) | Nd | Nd | Nd | 2 (6.5) | Nd | 1 (3.2) | Nd | 31 |
| Vavassori44 | 93 (28.2) | Nd | 24 (7.3) | 2 (0.6) | Nd | Nd | 9 (2.7) | Nd | 10 (3) | 2 (0.6) | 330 |
| Mavuduru40 | 1 (6.7) | Nd | 1 (6.7) | 0 | Nd | Nd | Nd | Nd | Nd | Nd | 15 |
| Jeong41 | 0 | 0 | 6 (4.3) | 0 | 0 | 0 | 0 | 0 | 1 (0.7) | 1 (0.7) | 140 |
| Zhang38 | Nd | Nd | 1 (1.6) | Nd | Nd | Nd | Nd | Nd | Nd | Nd | 62 |
| Becker36 | Nd | Nd | Nd | Nd | Nd | Nd | Nd | Nd | 1 (1.6) | 2 (3.2) | 62 |
| Kim33 | Nd | Nd | Nd | Nd | Nd | Nd | Nd | Nd | Nd | Nd | 336 |
| Sun30 | Nd | Nd | Nd | Nd | Nd | Nd | Nd | Nd | 3 (3.7) | Nd | 82 |
| Elkoushy28 | 52 (4.3) | 6 (0.5) | Nd | Nd | Nd | Nd | 13 (1.1) | Nd | 25 (2.1) | 14 (1.2) | 1216 |
| Fayad27 | Nd | 4 (6.7) | 4 (6.7) | 0 | Nd | 0 | 1 (1.7) | Nd | 0 | 0 | 60 |
| Elshal20 | 1 (1.1) | 3 (3.3) | Nd | 0 | Nd | 0 | 0 | Nd | 1 (1.1) | 0 | 92 |
| Elshal19 | 0 | 7 (14) | 12 (24) | 0 | Nd | 5 (10) | Nd | Nd | 0 | 1 (2) | 50 |
| Comat17 | 1 (0.5) | Nd | Nd | Nd | Nd | 7 (3.3) | 0 | Nd | Nd | Nd | 211 |
| Netsch14 | Nd | 8 (17.4) | 12 (26.1) | 1 (2.2) | Nd | 4 (8.7) | 2 (4.3) | 1 (2.2) | Nd | Nd | 46 |
| Peyronnet11 | Nd | 9 (9) | 9 (9) | 0 | Nd | Nd | 2 (2) | Nd | 0 | 1 (1) | 100 |
| Umari11 | 0 | Nd | 4 (8.9) | Nd | Nd | Nd | 0 | Nd | 1 (2.2) | 0 | 45 |
| Elshal64 | Nd | Nd | 9 (7.4) | 2 (1.7) | Nd | Nd | 0 | Nd | Nd | Nd | 121 |
| Enikeev62 | Nd | Nd | 1 (3.3) | Nd | Nd | 0 | 2 (6.7) | Nd | Nd | Nd | 30 |
| Ibraihim43 | Nd | Nd | Nd | Nd | Nd | Nd | 0 | Nd | Nd | Nd | 82 |
| Miernik21 | Nd | Nd | Nd | Nd | Nd | Nd | Nd | Nd | Nd | Nd | 114 |
| **Total included** | **1966** | **1616** | **1509** | **528** | **0** | **307** | **1813** | **46** | **2131** | **1898** |  |
| **patients** |  |  |  |  |  |  |  |  |  |  |  |
| **Overall complication** | **186 (9,4)** | **38 (2,3)** | **127 (8,4)** | **5 (0,9)** | **0** | **16 (5,2)** | **31 (1,7)** | **1 (2.2)** | **46 (2,1)** | **21 (1,1)** |  |
